# Supplementary material for: Protocols Targeting Afferent Pathways via Neuromuscular Electrical Stimulation for the Plantar Flexors: A Systematic Review
Source: MDPI journal article supplement (doi:10.3390/s23042347), 2023-02-20
Supplement: s1 [file s1]

## Supplementary Materials

**Appendix S1:** Search strategies and number of retrieved papers for each database.

| Database         | Retrieved Papers | Keywords                                                                                                                                                                                                                                                                                                                                                                                               |
|------------------|------------------|--------------------------------------------------------------------------------------------------------------------------------------------------------------------------------------------------------------------------------------------------------------------------------------------------------------------------------------------------------------------------------------------------------|
| Cochrane Library | 58               | ("neuromuscular electrical stimulation"):ti,ab,kw AND ("tibial nerve*" OR "triceps surae*" OR "soleus*" OR "gastrocnemious*" OR "calf*" OR "shank*" OR "plantar flex"):ti,ab,kw in Trials                                                                                                                                                                                                              |
| PubMed           | 76               | "neuromuscular electrical stimulation"[All Fields] AND ("tibial nerve"[All Fields] OR "triceps surae"[All Fields] OR "soleus"[All Fields] OR "gastrocnemious"[All Fields] OR "calf"[All Fields] OR "shank"[All Fields] OR "plantar flex"[All Fields]) Filters: Humans, English                                                                                                                         |
| Scopus           | 111              | (TITLE-ABS-KEY("neuromuscular electrical stimulation*)) AND (TITLE-ABS-KEY("tibial nerve*" OR "triceps surae*" OR "soleus*" OR "gastrocnemious*" OR "calf*" OR "shank*" OR "plantar flex*)) AND (LIMIT-TO (PUBSTAGE,"final")) AND (LIMIT-TO (DOCTYPE,"ar")) AND (LIMIT-TO (EXACTKEYWORD,"Human") OR LIMIT-TO (EXACTKEYWORD,"Humans")) AND (LIMIT-TO (LANGUAGE,"English")) AND (LIMIT-TO (SRCTYPE,"j")) |
| Web of Science   | 392              | (ALL= (neuromas`cular electrical stimulation*)) AND (ALL=("tibial nerve*" OR "triceps surae*" OR "soleus*" OR "gastrocnemious*" OR "calf*" OR "shank*" OR "plantar flex*)) AND LANGUAGE: (English) AND DOCUMENT TYPES: (Article)                                                                                                                                                                       |

**Appendix S2.** Quality assessment of the studies in chronological order (date of publication) according to Effective Public Health Practice Project (EPHH).

| Study                           | A | B | C | D | E | F | Intervention integrity |     |    | Analyses   |            |     |    | Global |
|---------------------------------|---|---|---|---|---|---|------------------------|-----|----|------------|------------|-----|----|--------|
|                                 |   |   |   |   |   |   | Q1                     | Q2  | Q3 | Q1         | Q2         | Q3  | Q4 |        |
| Collins, 2002 [5]               | 2 | 2 | 3 | 2 | 1 | 1 | <60%                   | Yes | No | Org./Inst. | Org./Inst. | Yes | No | 2      |
| Baldwin, 2006 [18]              | 2 | 2 | 1 | 2 | 1 | 1 | 80-100%                | No  | No | Org./Inst. | Org./Inst. | Yes | No | 1      |
| Klakowicz, 2006 [20]            | 2 | 2 | 2 | 2 | 1 | 2 | 80-100%                | Yes | No | Org./Inst. | Org./Inst. | Yes | No | 1      |
| Dean, 2007 [8]                  | 2 | 2 | 1 | 2 | 1 | 2 | 80-100%                | Yes | No | Org./Inst. | Org./Inst. | Yes | No | 1      |
| Dean, 2008 [37]                 | 2 | 2 | 1 | 2 | 1 | 2 | 80-100%                | Yes | No | Org./Inst. | Org./Inst. | Yes | No | 1      |
| Lagerquist, 2009 [41]           | 3 | 2 | 2 | 2 | 1 | 1 | 80-100%                | Yes | No | Org./Inst. | Org./Inst. | Yes | No | 2      |
| Lagerquist, 2010 [11]           | 2 | 2 | 1 | 2 | 1 | 2 | 80-100%                | Yes | No | Org./Inst. | Org./Inst. | Yes | No | 1      |
| Bergquist, 2011 [17]            | 2 | 2 | 1 | 2 | 1 | 2 | 80-100%                | Yes | No | Org./Inst. | Org./Inst. | Yes | No | 1      |
| Clair, 2011 [35]                | 2 | 2 | 2 | 2 | 1 | 2 | 80-100%                | Yes | No | Org./Inst. | Org./Inst. | Yes | No | 1      |
| Lagerquist, 2012 [12]           | 2 | 2 | 1 | 2 | 1 | 1 | 80-100%                | Yes | No | Org./Inst. | Org./Inst. | Yes | No | 1      |
| Dean, 2014 [38]                 | 2 | 2 | 1 | 2 | 1 | 2 | 80-100%                | Yes | No | Org./Inst. | Org./Inst. | Yes | No | 1      |
| Doix, 2014 [21]                 | 2 | 2 | 1 | 2 | 1 | 1 | 80-100%                | Yes | No | Org./Inst. | Org./Inst. | Yes | No | 1      |
| Neyroud, 2014 [42]              | 2 | 2 | 1 | 2 | 1 | 1 | 80-100%                | Yes | No | Org./Inst. | Org./Inst. | Yes | No | 1      |
| Papaiordanidou, 2014 [44]       | 2 | 2 | 1 | 2 | 1 | 1 | 80-100%                | Yes | No | Org./Inst. | Org./Inst. | Yes | No | 1      |
| Papaiordanidou, 2014 [43]       | 2 | 2 | 1 | 2 | 1 | 1 | 80-100%                | Yes | No | Org./Inst. | Org./Inst. | Yes | No | 1      |
| Regina Dias Da Silva, 2015 [45] | 2 | 2 | 1 | 2 | 1 | 1 | 80-100%                | Yes | No | Org./Inst. | Org./Inst. | Yes | No | 1      |
| Wegrzyk, 2015 [34]              | 2 | 2 | 1 | 2 | 1 | 1 | 80-100%                | Yes | No | Org./Inst. | Org./Inst. | Yes | No | 1      |
| Wegrzyk, 2015 [47]              | 2 | 2 | 1 | 2 | 1 | 1 | 80-100%                | Yes | No | Org./Inst. | Org./Inst. | Yes | No | 1      |
| Martin, 2016 [26]               | 2 | 2 | 1 | 2 | 1 | 2 | 80-100%                | Yes | No | Org./Inst. | Org./Inst. | Yes | No | 1      |
| Wegrzyk, 2017 [15]              | 2 | 2 | 1 | 2 | 1 | 2 | 80-100%                | Yes | No | Org./Inst. | Org./Inst. | Yes | No | 1      |
| Cheng, 2017 [36]                | 2 | 2 | 1 | 2 | 1 | 1 | 80-100%                | Yes | No | Org./Inst. | Org./Inst. | Yes | No | 1      |
| Grosprêtre, 2017 [39]           | 2 | 2 | 1 | 2 | 1 | 1 | 80-100%                | Yes | No | Org./Inst. | Org./Inst. | Yes | No | 1      |
| Grosprêtre, 2018 [40]           | 2 | 2 | 1 | 2 | 1 | 1 | 80-100%                | Yes | No | Org./Inst. | Org./Inst. | Yes | No | 1      |
| Mani, 2018 [32]                 | 2 | 1 | 1 | 2 | 1 | 1 | 80-100%                | Yes | No | Org./Inst. | Org./Inst. | Yes | No | 1      |
| Neyroud, 2018 [7]               | 2 | 2 | 1 | 2 | 1 | 1 | 80-100%                | Yes | No | Org./Inst. | Org./Inst. | Yes | No | 1      |
| Neyroud 2019 [16]               | 2 | 1 | 1 | 2 | 1 | 1 | 80-100%                | Yes | No | Org./Inst. | Org./Inst. | Yes | No | 1      |
| Vitry, 2019 [13]                | 2 | 2 | 1 | 2 | 1 | 1 | 80-100%                | Yes | No | Org./Inst. | Org./Inst. | Yes | No | 1      |
| Vitry, 2019 [46]                | 2 | 2 | 1 | 2 | 1 | 1 | 80-100%                | Yes | No | Org./Inst. | Org./Inst. | Yes | No | 1      |
| Vitry, 2019 [30]                | 2 | 1 | 1 | 2 | 1 | 1 | 80-100%                | Yes | No | Org./Inst. | Org./Inst. | Yes | No | 1      |
| Bouguetoch, 2021 [29]           | 2 | 1 | 1 | 2 | 1 | 1 | 80-100%                | Yes | No | Org./Inst. | Org./Inst. | Yes | No | 1      |
| Donnelly, 2021 [31]             | 2 | 1 | 2 | 2 | 1 | 1 | 80-100%                | Yes | No | Org./Inst. | Org./Inst. | Yes | No | 1      |
| Espeit, 2021 [33]               | 2 | 1 | 1 | 2 | 1 | 1 | 80-100%                | Yes | No | Org./Inst. | Org./Inst. | Yes | No | 1      |

**Abbreviations:** A: Selection bias; B: Study design; C: Confounders; D: Blinding; E: Data collection methods; F: Withdrawals and dropouts; 1: Strong; 2: Moderate; 3: Weak; Org./Inst: Organization/Institution.
